# Supplementary material for: Non-innocent ligand flavone and curcumin inspired ruthenium photosensitizers for solar energy conversion
Source: Royal Society of Chemistry journal article supplement (doi:10.1039/d1cp01853a), 2021-01-01
Supplement: d1cp01853a1.pdf [file d1cp01853a1.pdf]

## Electronic Supplementary Information: Non-Innocent Ligand Flavin and Curcumin Inspired Ruthenium Photosensitizers for Solar Energy Conversion

Nicholas A. Lee<sup>a</sup>, Ken. T. Ngo<sup>a</sup>, Gerald E. Gilligan<sup>a</sup>, Massimiliano Lamberto<sup>b</sup>, Jonathan Rochford<sup>a\*</sup>

<sup>a</sup>Dept. of Chemistry, University of Massachusetts Boston, 100 Morrissey Boulevard, Boston, MA 02188, USA.

<sup>b</sup>Dept. of Chemistry and Physics, Monmouth University, 400 Cedar Avenue, West Long Branch, NJ 07764, USA.

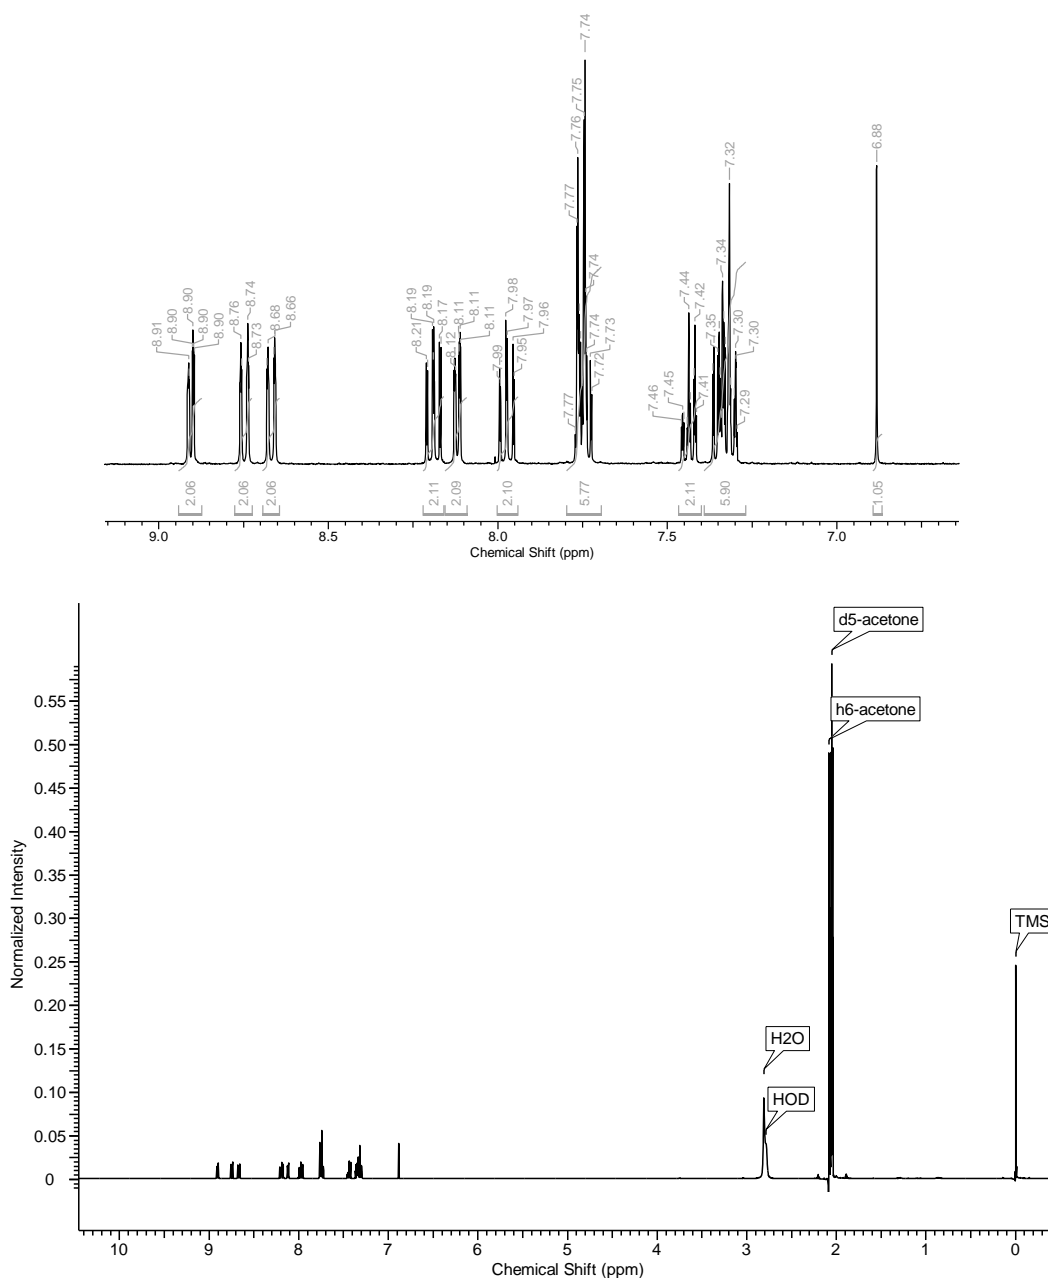

**Figure ESI-1.** <sup>1</sup>H NMR spectrum for [Ru(Ph<sub>2</sub>acac)(bpy)<sub>2</sub>][PF<sub>6</sub>]<sub>2</sub> (**4**<sup>+</sup>) recorded in *d*<sup>6</sup>-acetone ( $\delta = 2.05$  ppm).

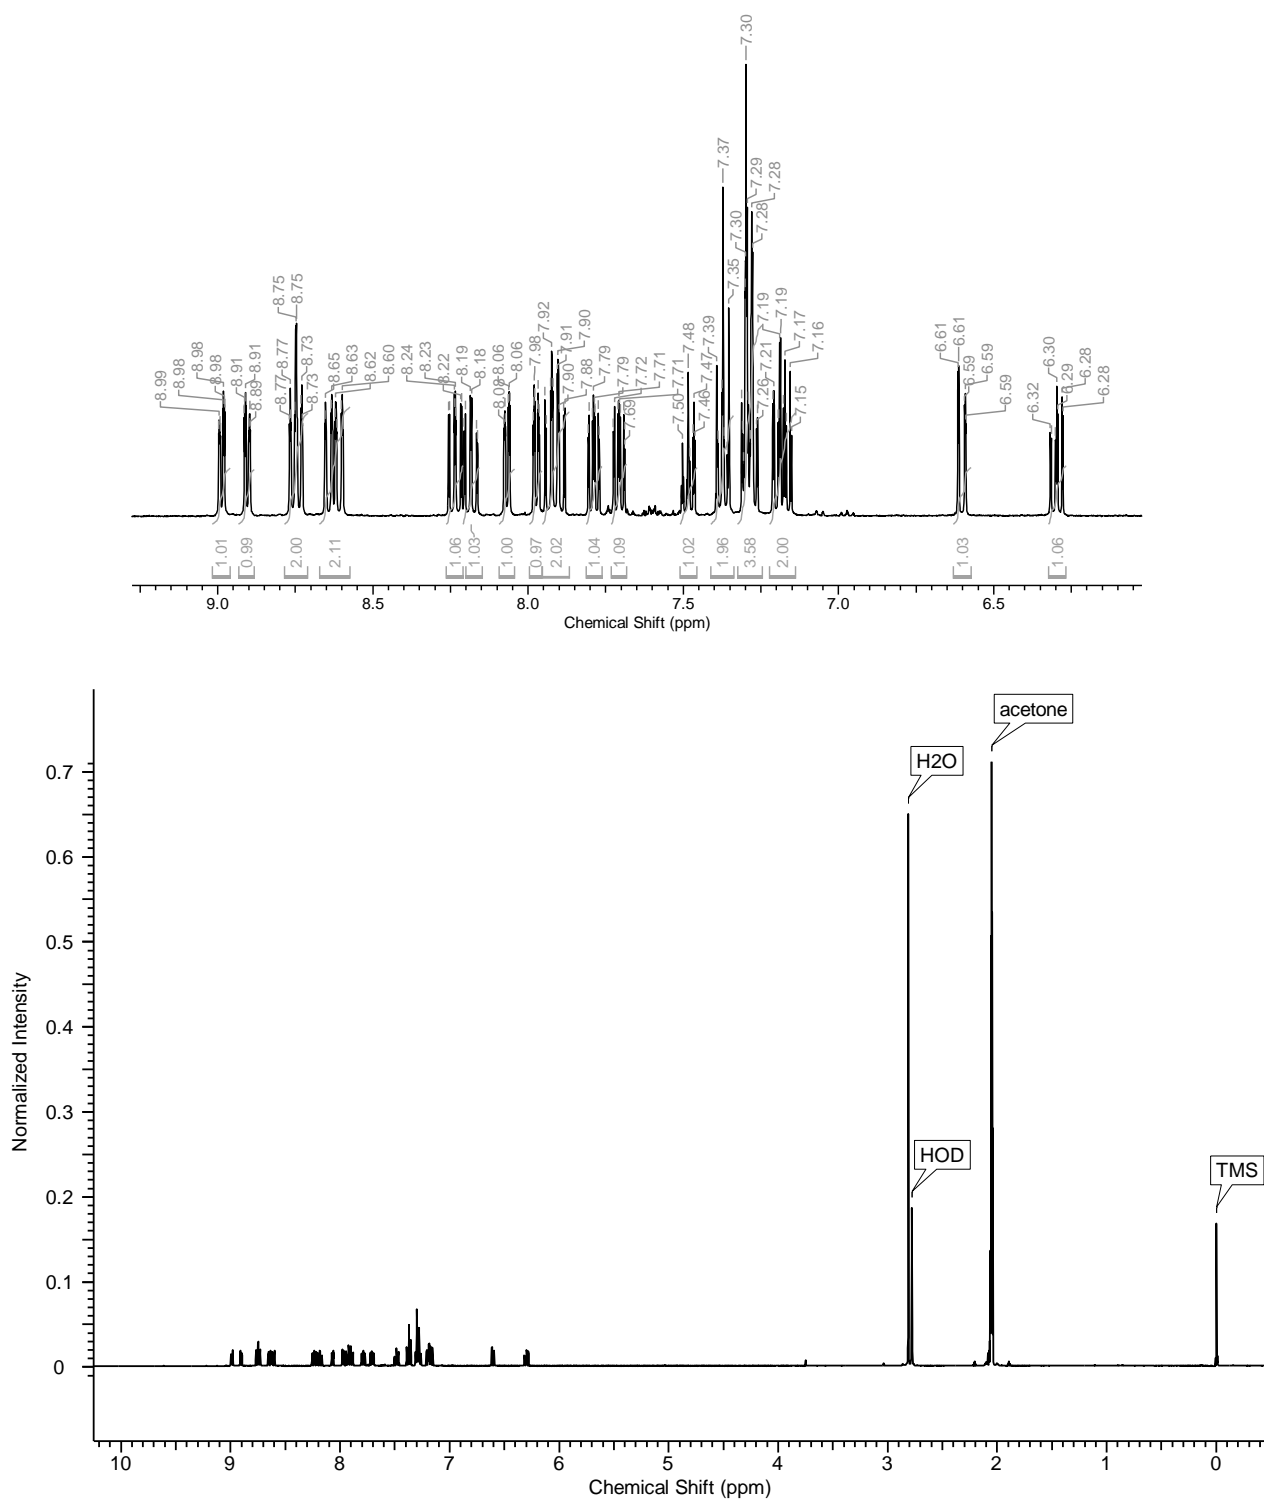

**Figure ESI-2.**  $^1\text{H}$  NMR spectrum for  $[\text{Ru}(\text{OBP})(\text{bpy})_2][\text{PF}_6]_2$  ( $5^+$ ) recorded in  $d^6$ -acetone ( $\delta = 2.05$  ppm).

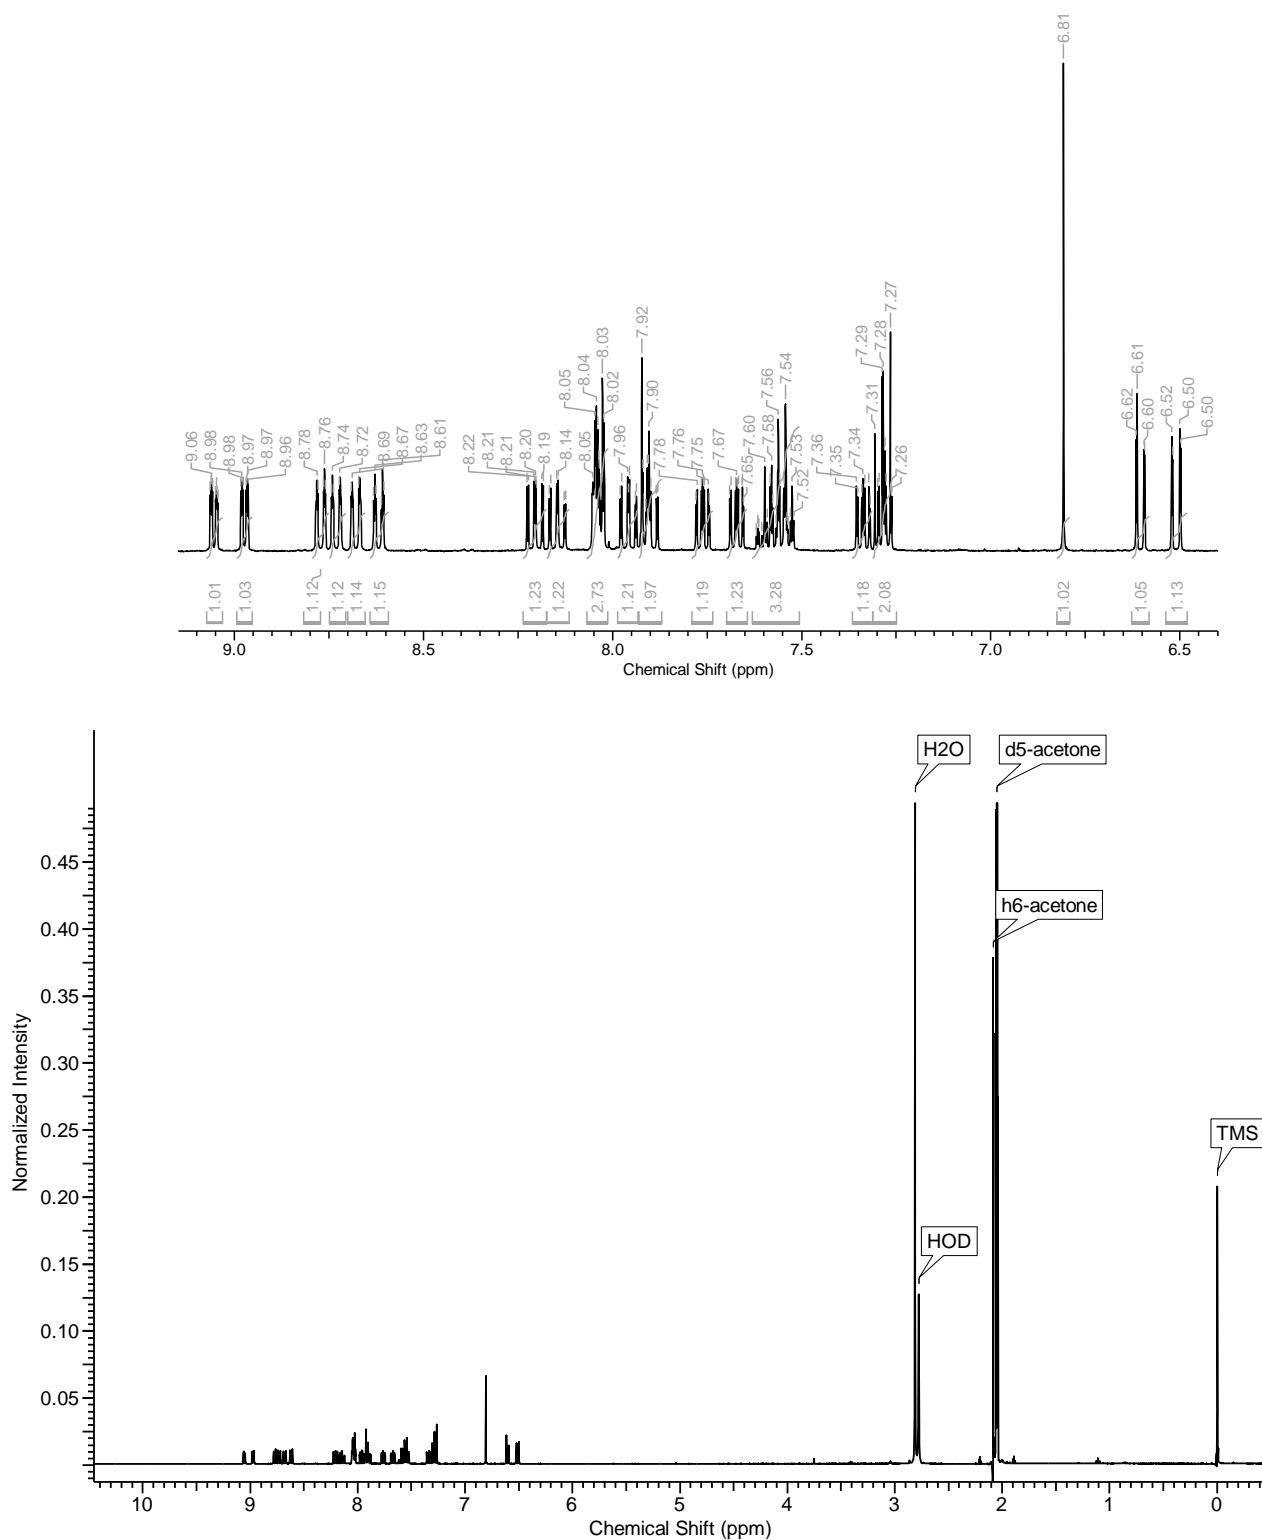

**Figure ESI-3.**  $^1\text{H}$  NMR spectrum for  $[\text{Ru}(\text{OFlav})(\text{bpy})_2](\text{PF}_6)_2$  ( $6^+$ ) recorded in  $d^6$ -acetone ( $\delta = 2.05$  ppm).

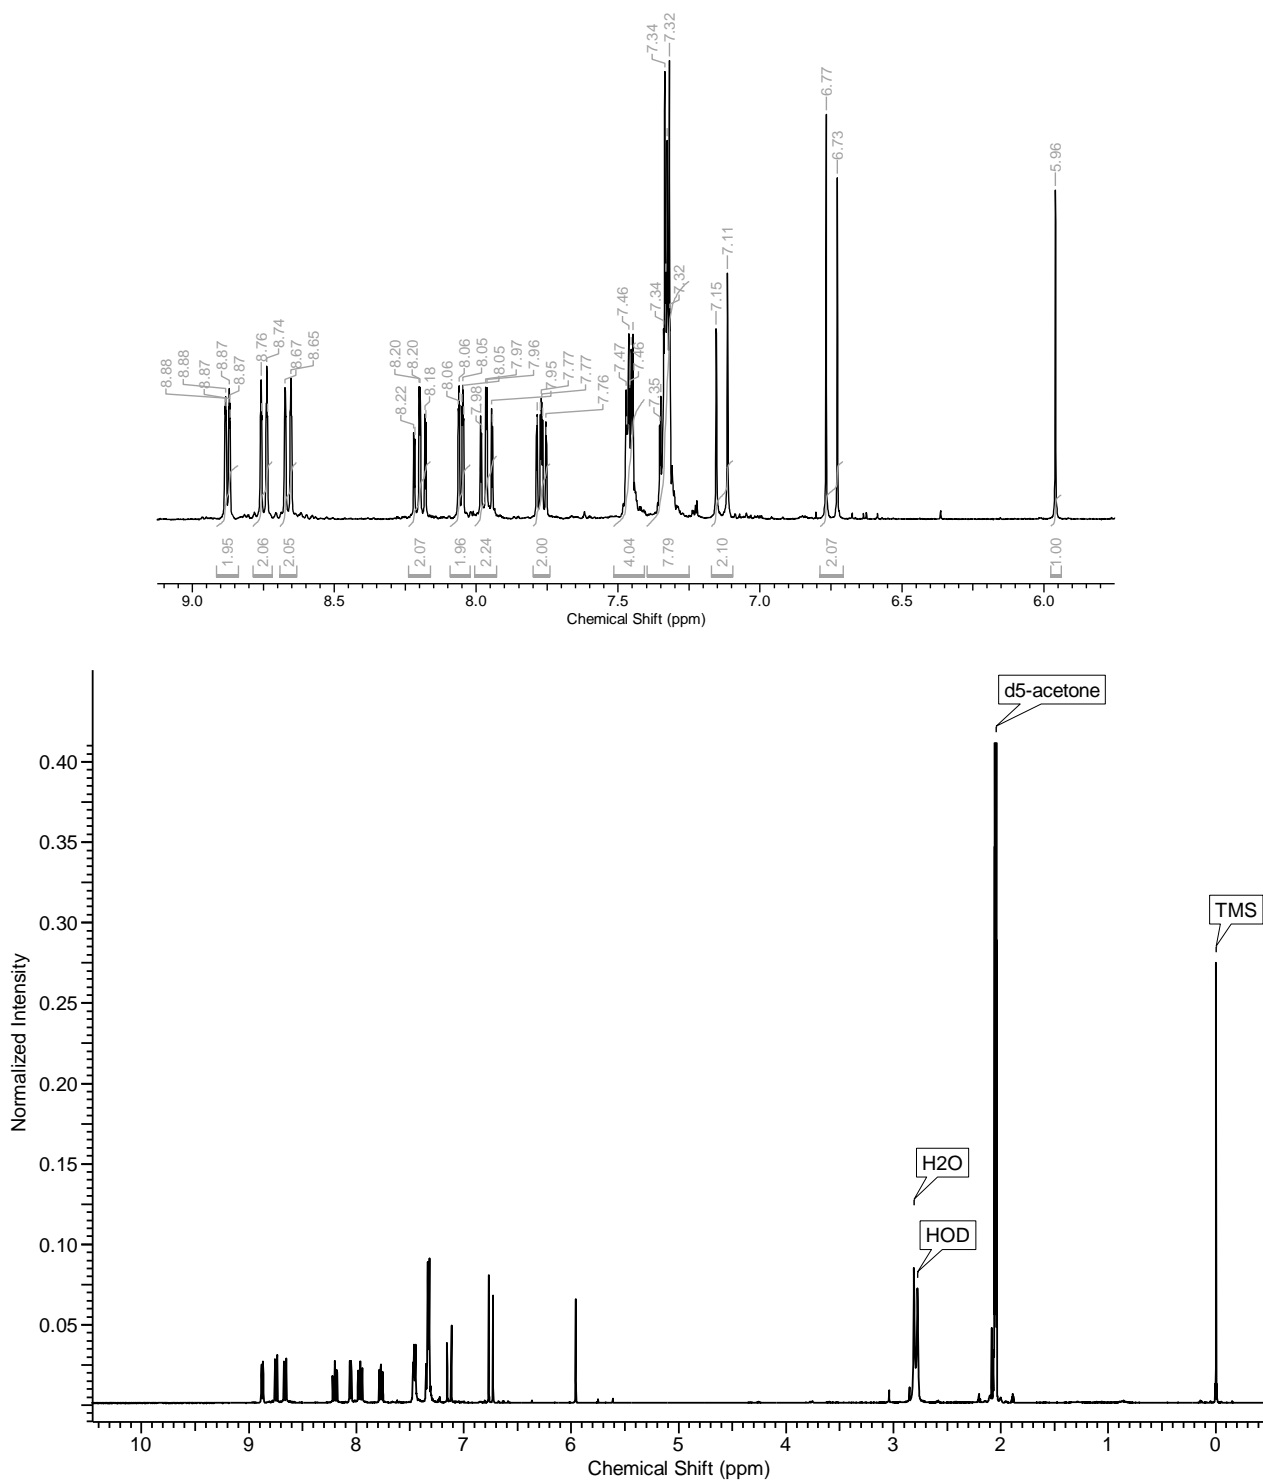

**Figure ESI-4.**  $^1\text{H}$  NMR spectrum for  $[\text{Ru}(\text{Ph}_2\text{curc})(\text{bpy})_2][\text{PF}_6]_2$  ( $7^+$ ) recorded in  $d^6$ -acetone ( $\delta = 2.05$  ppm).

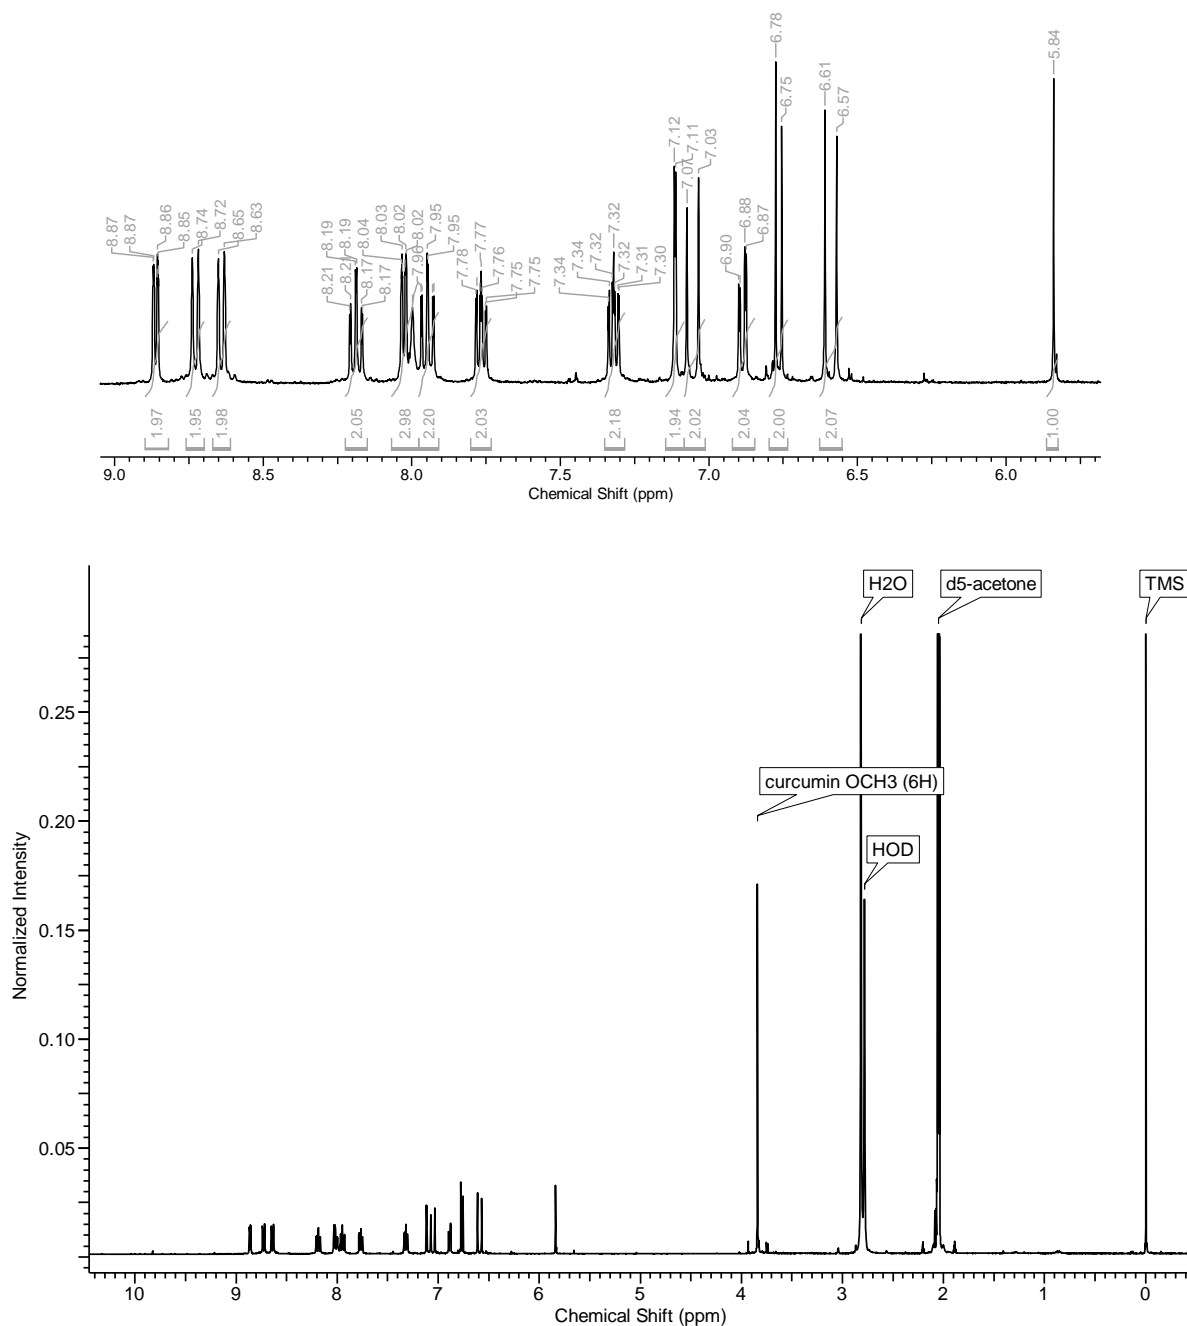

**Figure ESI-5.** <sup>1</sup>H NMR spectrum for [Ru(curc)(bpy)<sub>2</sub>][PF<sub>6</sub>]<sub>2</sub> (**8**<sup>+</sup>) recorded in d<sup>6</sup>-acetone (δ = 2.05 ppm). Note: The broad shoulder peak at 8.00 ppm [8.00 – 8.04 (m, 4H)], is assigned to the curcumin -OH peaks and thus has low integration due to proton acidity and H/D exchange in solution. The multiplet occurring at 8.00 – 8.04 ppm is thus attributed to 4H although it integrates as 3H.

**Table ESI-1.** Percentage contributions (%) of Ru, bpy and NIL to the frontier molecular orbitals of complexes **1**<sup>2+</sup> - **8**<sup>+</sup> as determined by Mulliken population analysis.

|                        | MO   | Ru( <i>dπ</i> ) | NIL( <i>π</i> ) | bpy( <i>π</i> ) | Energy (eV) |
|------------------------|------|-----------------|-----------------|-----------------|-------------|
| <b>1</b> <sup>2+</sup> | LUMO | 1               | ~               | 99              | -2.59       |
|                        | HOMO | 85              | ~               | 15              | -6.07       |
| <b>2</b>               | LUMO | 3               | 0               | 97              | -2.27       |
|                        | HOMO | 51              | 38              | 11              | -5.16       |
|                        | H-1  | 52              | 40              | 8               | -5.41       |
|                        | H-2  | 48              | 45              | 7               | -5.45       |
|                        | H-3  | 0               | 100             | 0               | -5.99       |
|                        | H-4  | 32              | 60              | 8               | -6.46       |
|                        | H-5  | 30              | 62              | 8               | -6.49       |
|                        | H-6  | 26              | 63              | 11              | -6.62       |
| <b>3</b> <sup>+</sup>  | LUMO | 4               | 0               | 96              | -2.25       |
|                        | HOMO | 67              | 21              | 12              | -5.36       |
|                        | H-1  | 72              | 14              | 14              | -5.37       |
|                        | H-2  | 81              | 7               | 13              | -5.37       |
|                        | H-3  | 19              | 74              | 7               | -6.52       |
|                        | H-4  | 1               | 1               | 98              | -7.12       |
|                        | H-5  | 0               | 0               | 99              | -7.14       |
|                        | H-6  | 4               | 87              | 9               | -7.42       |
| <b>4</b> <sup>+</sup>  | LUMO | 4               | 0               | 96              | -2.27       |
|                        | HOMO | 69              | 18              | 13              | -5.41       |
|                        | H-1  | 70              | 17              | 12              | -5.42       |
|                        | H-2  | 76              | 12              | 4               | -5.72       |
|                        | H-3  | 14              | 82              | 1               | -6.31       |
|                        | H-4  | 1               | 99              | 0               | -7.02       |
|                        | H-5  | 0               | 99              | 95              | -7.03       |
|                        | H-6  | 0               | 5               | 13              | -7.12       |
| <b>5</b> <sup>+</sup>  | LUMO | 4               | 2               | 95              | -2.29       |
|                        | HOMO | 46              | 46              | 8               | -5.23       |
|                        | H-1  | 75              | 9               | 16              | -5.41       |
|                        | H-2  | 76              | 11              | 12              | -5.74       |
|                        | H-3  | 34              | 58              | 8               | -6.2        |
|                        | H-4  | 0               | 97              | 2               | -7.05       |
|                        | H-5  | 0               | 7               | 93              | -7.13       |
|                        | H-6  | 0               | 57              | 43              | -7.15       |
| <b>6</b> <sup>+</sup>  | LUMO | 4               | 2               | 94              | -2.26       |
|                        | HOMO | 43              | 51              | 6               | -5.13       |
|                        | H-1  | 73              | 10              | 17              | -5.35       |
|                        | H-2  | 71              | 16              | 13              | -5.58       |
|                        | H-3  | 43              | 49              | 8               | -6.1        |
|                        | H-4  | 1               | 98              | 0               | -6.75       |
|                        | H-5  | 0               | 6               | 93              | -7.1        |
|                        | H-6  | 0               | 2               | 98              | -7.14       |
| <b>7</b> <sup>+</sup>  | LUMO | 2               | 85              | 13              | -2.35       |
|                        | HOMO | 76              | 9               | 15              | -5.37       |
|                        | H-1  | 60              | 30              | 10              | -5.37       |
|                        | H-2  | 69              | 19              | 12              | -5.62       |
|                        | H-3  | 11              | 87              | 2               | -5.89       |
|                        | H-4  | 11              | 86              | 3               | -6.56       |
|                        | H-5  | 9               | 77              | 13              | -6.94       |
|                        | H-6  | 0               | 100             | 0               | -7.04       |
| <b>8</b> <sup>+</sup>  | LUMO | 3               | 47              | 50              | -2.26       |
|                        | HOMO | 51              | 40              | 9               | -5.3        |
|                        | H-1  | 69              | 19              | 12              | -5.33       |
|                        | H-2  | 36              | 57              | 8               | -5.47       |
|                        | H-3  | 40              | 52              | 8               | -5.54       |
|                        | H-4  | 25              | 71              | 4               | -6.02       |
|                        | H-5  | 6               | 92              | 2               | -6.47       |
|                        | H-6  | 6               | 91              | 3               | -6.72       |

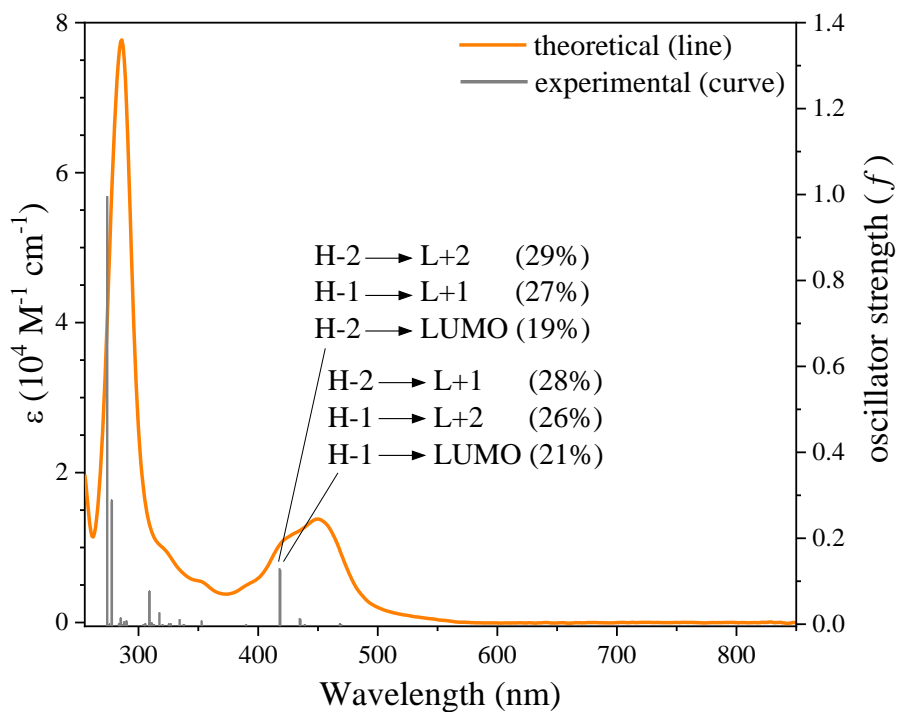

**Figure ESI-6.** Overlay of experimental (acetonitrile) and theoretical (TDDFT) spectra for  $1^+$ .

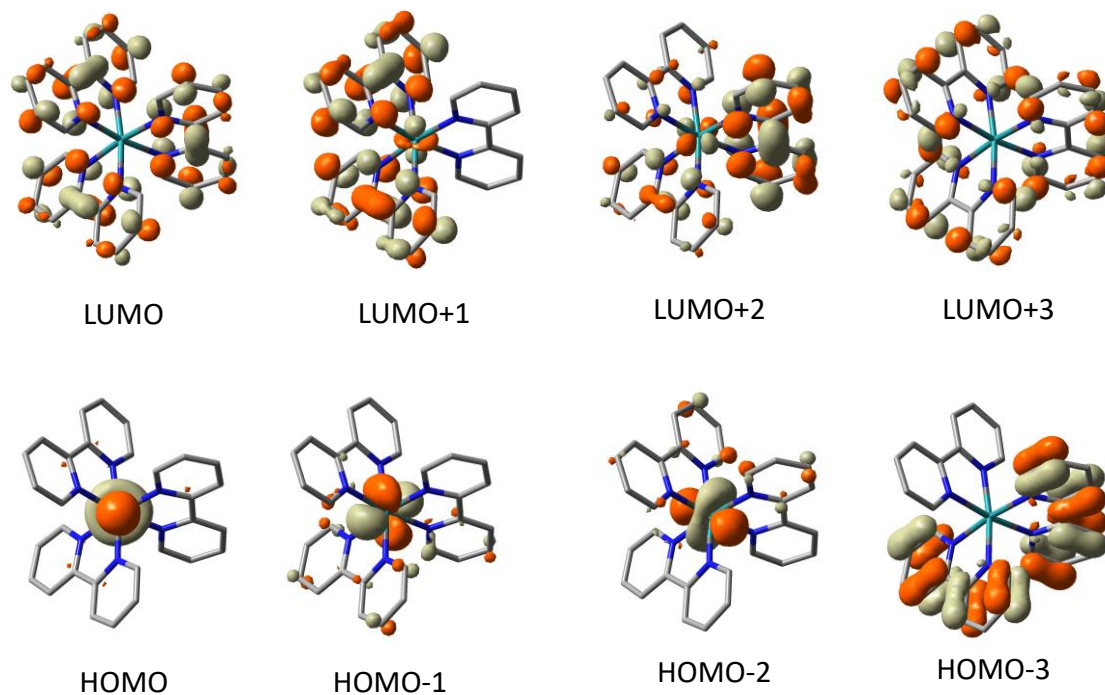

**Figure ESI-7.** Select frontier molecular orbital surfaces for  $1^+$  (isofactor = 0.04).

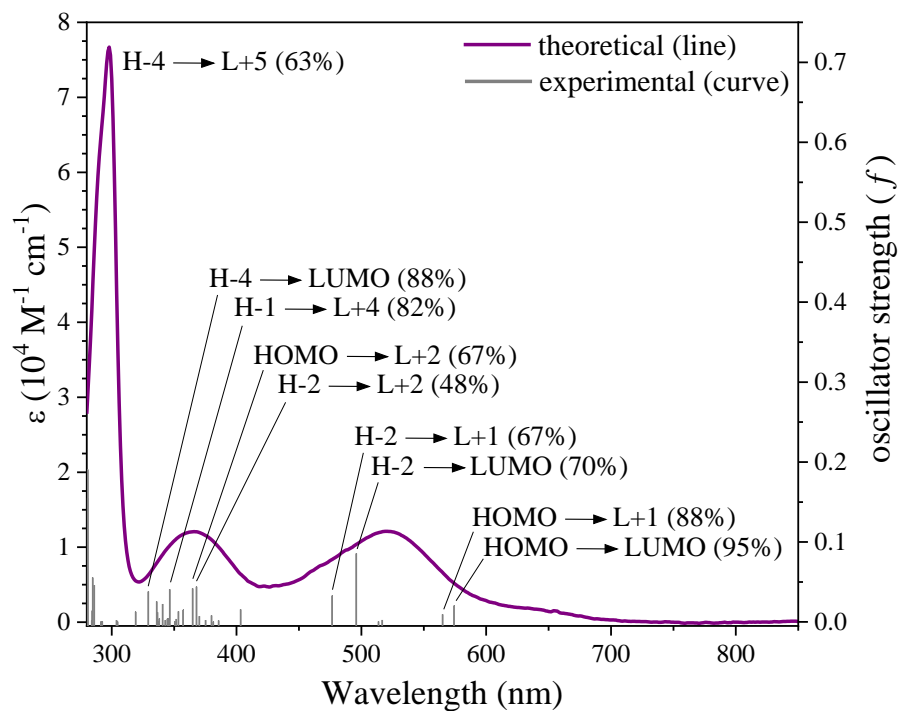

**Figure ESI-8.** Overlay of experimental (acetonitrile) and theoretical (TDDFT) spectra for **2**.

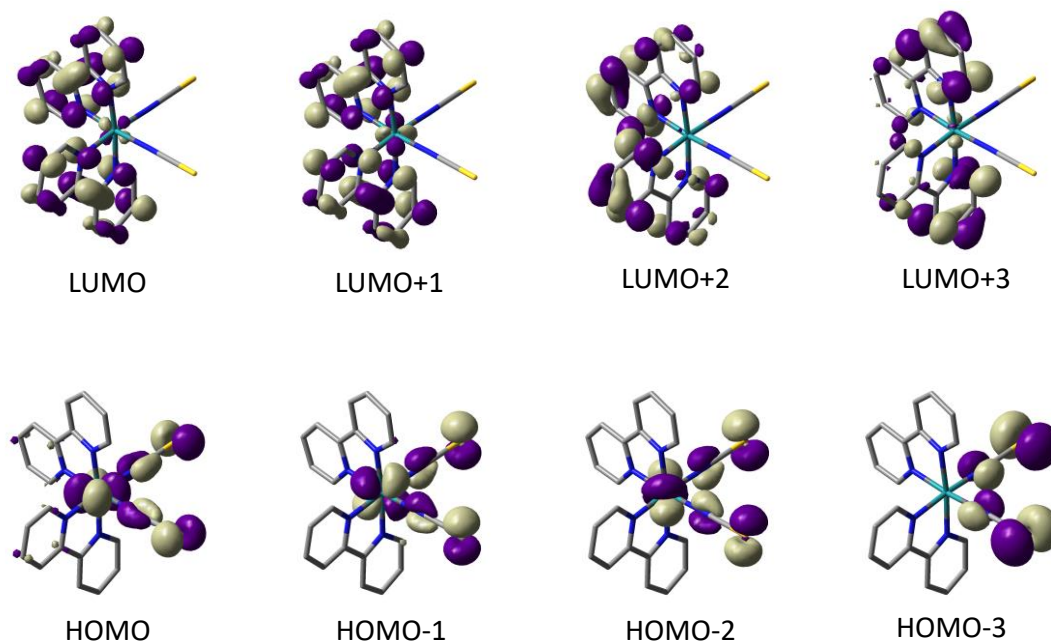

**Figure ESI-9.** Select frontier molecular orbital surfaces for **2** (isofactor = 0.04).



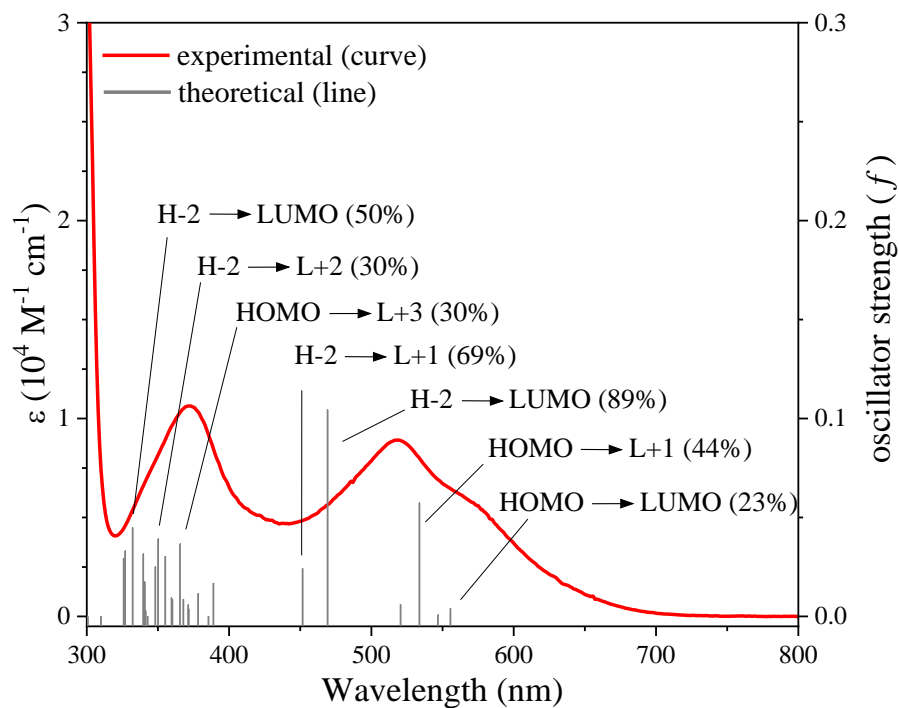

**Figure ESI-10.** Overlay of experimental (acetone nitrile) and theoretical (TDDFT) spectra for  $3^+$ .

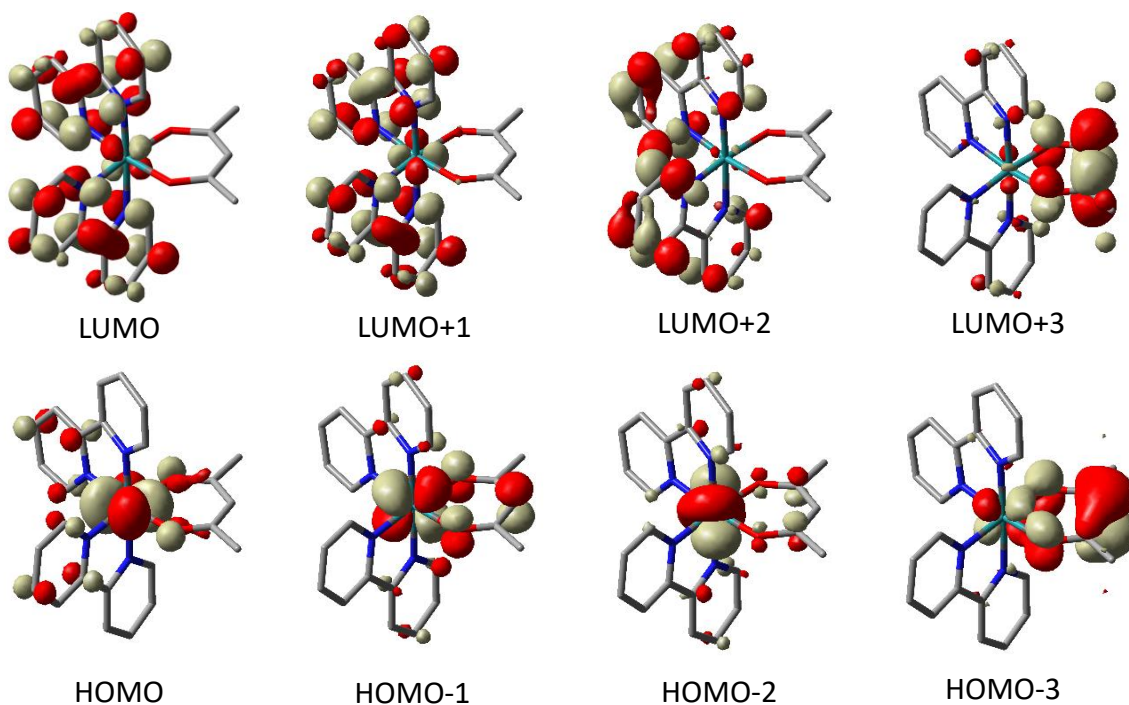

**Figure ESI-11.** Select frontier molecular orbital surfaces for  $3^+$  (isofactor = 0.04).

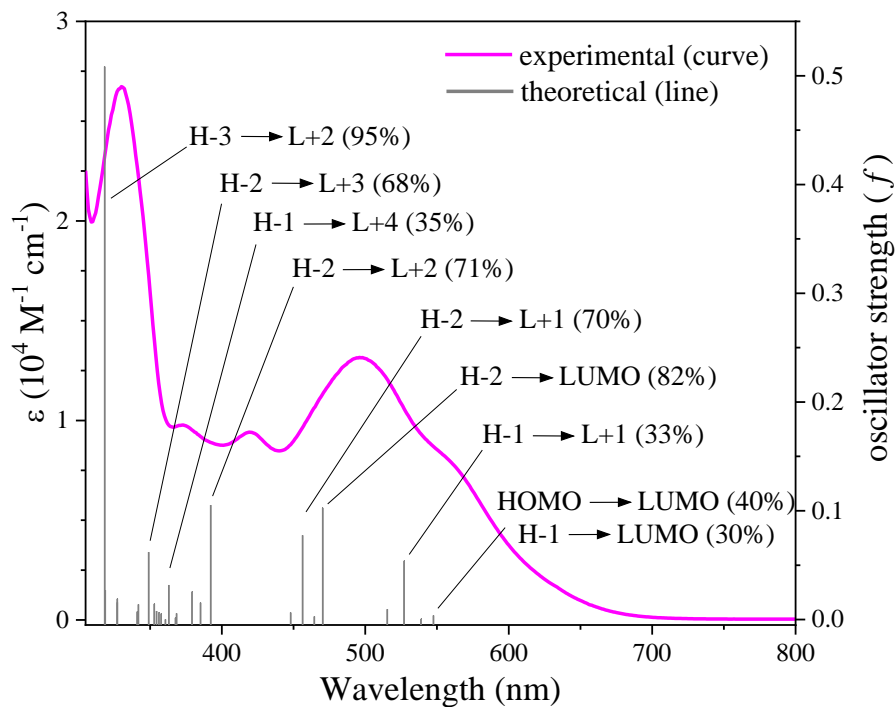

**Figure ESI-12.** Overlay of experimental (acetonitrile) and theoretical (TDDFT) spectra for  $4^+$ .

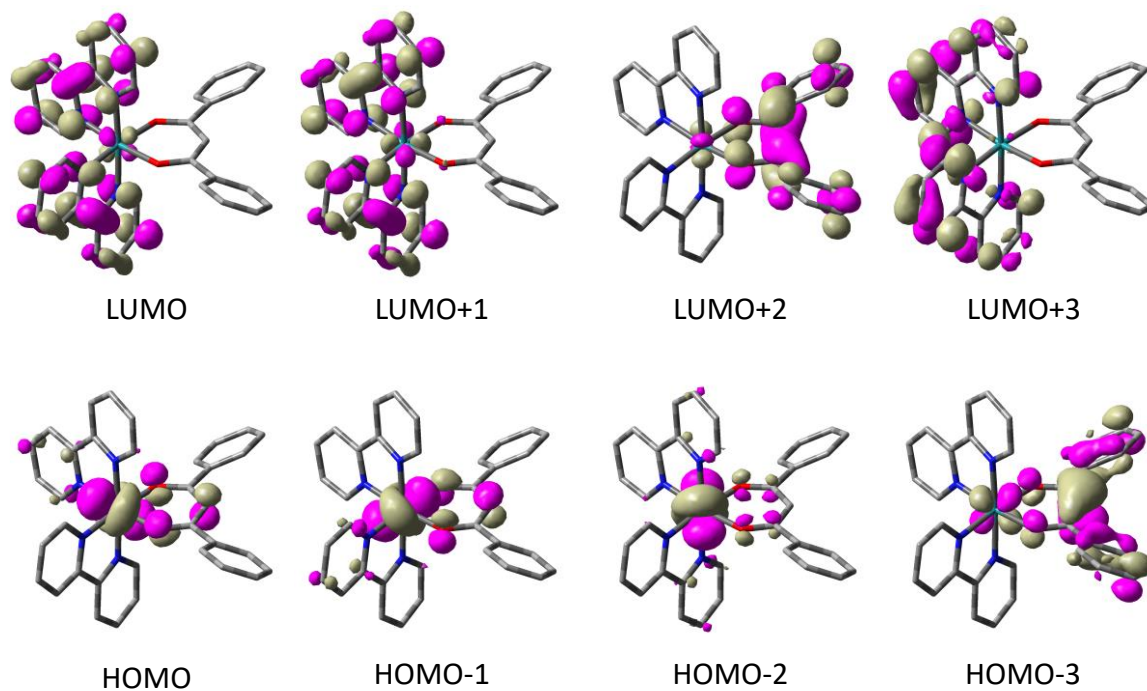

**Figure ESI-13.** Select frontier molecular orbital surfaces for  $4^+$  (isofactor = 0.04).

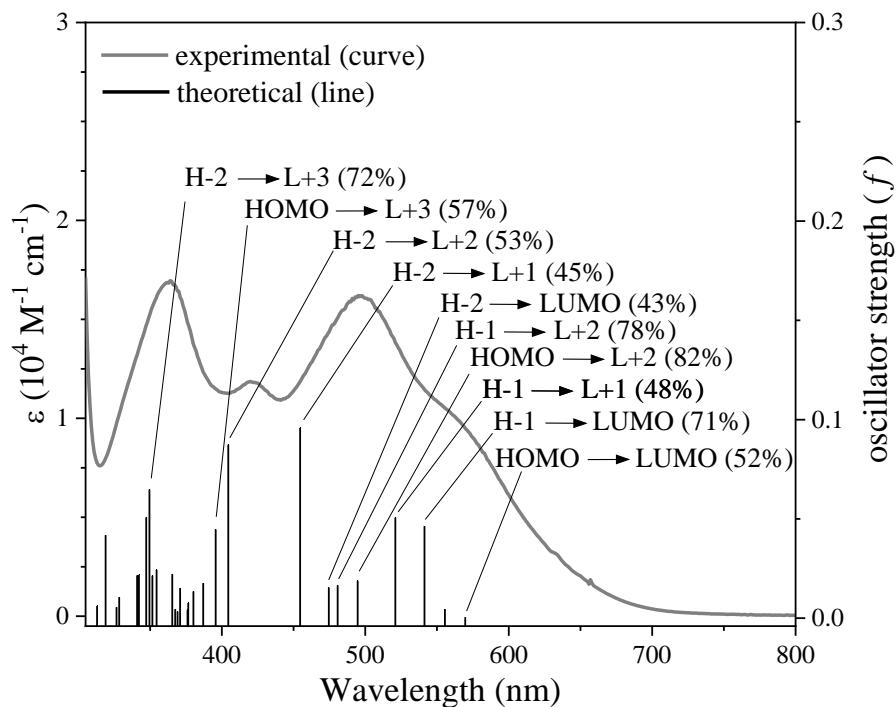

**Figure ESI-14.** Overlay of experimental (acetone) and theoretical (TDDFT) spectra for  $5^+$ .

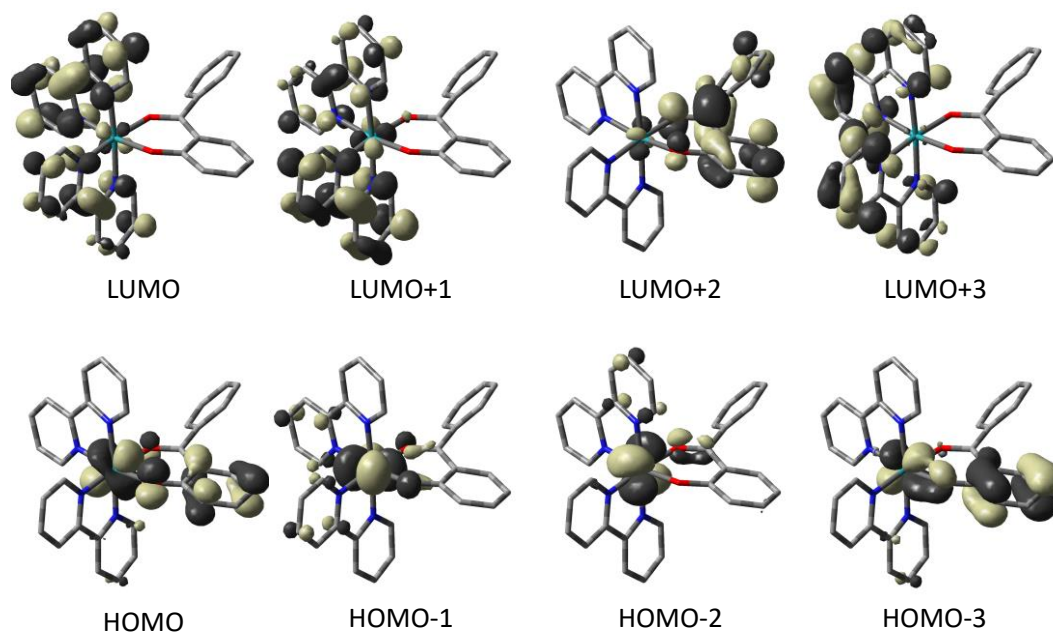

**Figure ESI-15.** Select frontier molecular orbital surfaces for  $5^+$  (isofactor = 0.04).

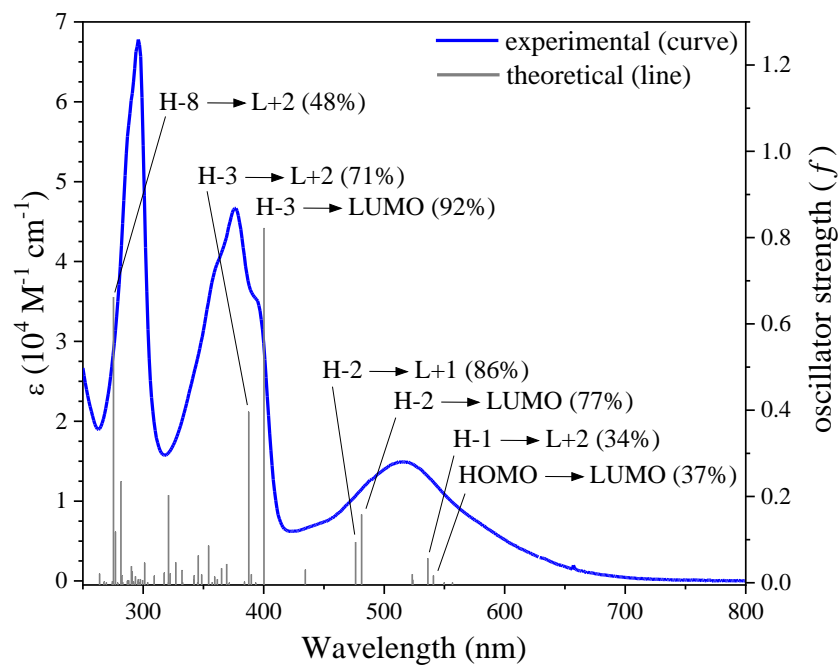

**Figure ESI-16.** Overlay of experimental (acetonitrile) and theoretical (TDDFT) spectra for  $7^+$ .

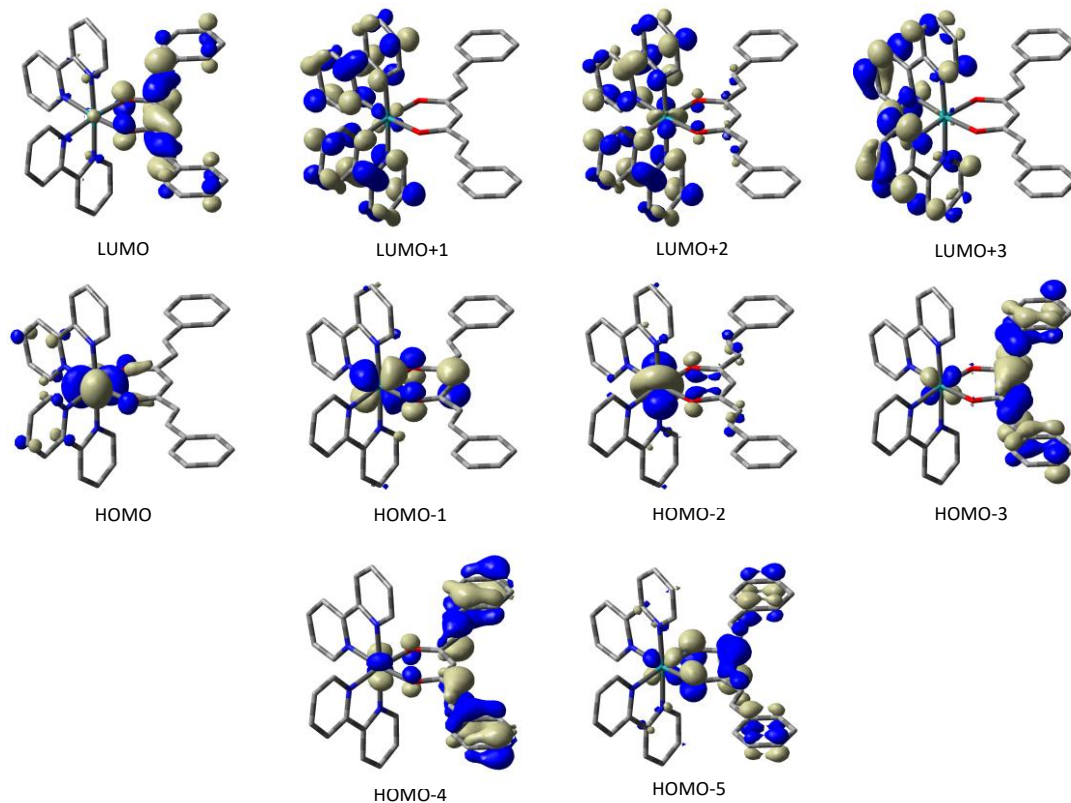

**Figure ESI-17.** Select frontier molecular orbital surfaces for  $7^+$  (isofactor = 0.04).

Table ESI-2. DFT cartesian coordinates for  $\mathbf{1}^{2+}$ .

| Tag | Symbol | X         | Y          | Z         |
|-----|--------|-----------|------------|-----------|
| 1   | Ru     | 5.9368523 | 3.4266533  | 3.7487357 |
| 2   | N      | 4.2097592 | 2.8477128  | 4.8155180 |
| 3   | N      | 4.4041351 | 4.4202648  | 2.6920320 |
| 4   | N      | 6.2918120 | 5.2152605  | 4.8115830 |
| 5   | N      | 7.5609430 | 4.2646625  | 2.6890249 |
| 6   | N      | 7.3153067 | 2.2246154  | 4.8035193 |
| 7   | C      | 4.1905473 | 2.0270633  | 5.8834812 |
| 8   | C      | 3.0160395 | 1.6733287  | 6.5374395 |
| 9   | C      | 1.8075193 | 2.1857302  | 6.0684478 |
| 10  | C      | 1.8186472 | 3.0326616  | 4.9645749 |
| 11  | C      | 3.0322409 | 3.3527942  | 4.3489590 |
| 12  | C      | 3.1422028 | 4.2412518  | 3.1756724 |
| 13  | C      | 2.0463207 | 4.8666697  | 2.5737915 |
| 14  | C      | 2.2421295 | 5.6836372  | 1.4646137 |
| 15  | C      | 3.5358339 | 5.8591794  | 0.9762587 |
| 16  | C      | 4.5855776 | 5.2121944  | 1.6175729 |
| 17  | C      | 5.5873151 | 5.6386306  | 5.8788327 |
| 18  | C      | 5.8530697 | 6.8403508  | 6.5245572 |
| 19  | C      | 6.8887104 | 7.6422870  | 6.0479934 |
| 20  | C      | 7.6212763 | 7.2119768  | 4.9460027 |
| 21  | C      | 7.3079571 | 5.9917739  | 4.3395550 |
| 22  | C      | 8.0290064 | 5.4515757  | 3.1705042 |
| 23  | C      | 9.1187483 | 6.0907343  | 2.5719340 |
| 24  | C      | 9.7360544 | 5.5122561  | 1.4673874 |
| 25  | C      | 9.2484661 | 4.3009440  | 0.9800674 |
| 26  | C      | 8.1634817 | 3.7116981  | 1.6185748 |
| 27  | C      | 8.0399981 | 2.6198774  | 5.8679329 |
| 28  | C      | 8.9491379 | 1.7864928  | 6.5089589 |
| 29  | C      | 9.1214252 | 0.4887810  | 6.0301727 |
| 30  | C      | 8.3772793 | 0.0730956  | 4.9304065 |
| 31  | C      | 7.4761025 | 0.9566070  | 4.3291828 |
| 32  | C      | 6.6412588 | 0.6034567  | 3.1645001 |
| 33  | C      | 6.6469718 | -0.6587153 | 2.5633742 |
| 34  | C      | 5.8295723 | -0.9026719 | 1.4641387 |
| 35  | C      | 5.0186800 | 0.1250993  | 0.9853738 |
| 36  | C      | 5.0543900 | 1.3580296  | 1.6262000 |
| 37  | H      | 5.1506525 | 1.6533423  | 6.2164488 |
| 38  | H      | 3.0587511 | 1.0103604  | 7.3936594 |
| 39  | H      | 0.8704914 | 1.9322267  | 6.5519710 |
| 40  | H      | 0.8889973 | 3.4383526  | 4.5868204 |
| 41  | H      | 1.0480734 | 4.7199678  | 2.9655187 |

|    |   |            |            |           |
|----|---|------------|------------|-----------|
| 42 | H | 1.3977126  | 6.1727592  | 0.9915282 |
| 43 | H | 3.7385881  | 6.4843479  | 0.1145524 |
| 44 | H | 5.6054026  | 5.3183696  | 1.2699729 |
| 45 | H | 4.7937231  | 4.9848555  | 6.2179011 |
| 46 | H | 5.2550975  | 7.1322166  | 7.3799429 |
| 47 | H | 7.1242167  | 8.5876265  | 6.5243763 |
| 48 | H | 8.4274519  | 7.8237829  | 4.5622668 |
| 49 | H | 9.4857952  | 7.0305835  | 2.9635220 |
| 50 | H | 10.5824756 | 6.0009516  | 0.9974620 |
| 51 | H | 9.6946815  | 3.8122464  | 0.1218530 |
| 52 | H | 7.7534641  | 2.7720736  | 1.2703120 |
| 53 | H | 7.8740261  | 3.6340631  | 6.2085346 |
| 54 | H | 9.5049112  | 2.1563231  | 7.3626429 |
| 55 | H | 9.8224904  | -0.1904367 | 6.5026486 |
| 56 | H | 8.5004314  | -0.9305037 | 4.5446005 |
| 57 | H | 7.2807929  | -1.4468726 | 2.9488907 |
| 58 | H | 5.8276220  | -1.8789598 | 0.9919655 |
| 59 | H | 4.3659739  | -0.0161178 | 0.1318568 |
| 60 | H | 4.4425519  | 2.1840401  | 1.2862621 |
| 61 | N | 5.8430345  | 1.6020580  | 2.6905240 |

Table ESI-3. DFT cartesian coordinates for **2**.

| Tag | Symbol | X          | Y          | Z          |
|-----|--------|------------|------------|------------|
| 1   | Ru     | -1.0603300 | 0.7138940  | 3.9051130  |
| 2   | S      | 1.7404390  | 4.1394570  | 1.7747630  |
| 3   | N      | 0.1259880  | 2.1816490  | 3.0247760  |
| 4   | N      | -0.0022520 | -0.7468030 | 2.8412130  |
| 5   | N      | -2.1490810 | 0.6088600  | 2.1106560  |
| 6   | C      | 0.7957560  | 2.9959430  | 2.5003350  |
| 7   | C      | 1.0831860  | -1.4050550 | 3.2894800  |
| 8   | C      | 1.7532040  | -2.3554800 | 2.5284580  |
| 9   | C      | 1.2846260  | -2.6401110 | 1.2463530  |
| 10  | C      | 0.1643110  | -1.9631130 | 0.7751760  |
| 11  | C      | -0.4675500 | -1.0170290 | 1.5879870  |
| 12  | C      | -1.6604880 | -0.2531630 | 1.1759910  |
| 13  | C      | -2.2758350 | -0.3821890 | -0.0730830 |
| 14  | C      | -3.4014940 | 0.3812480  | -0.3671200 |
| 15  | C      | -3.8908030 | 1.2629150  | 0.5964770  |
| 16  | C      | -3.2358800 | 1.3481560  | 1.8197780  |
| 17  | N      | -2.2469030 | 2.1815590  | 4.7852670  |
| 18  | N      | -2.1181720 | -0.7468800 | 4.9691590  |
| 19  | N      | 0.0284480  | 0.6092100  | 5.6995660  |
| 20  | C      | -2.9168960 | 2.9959970  | 5.3091970  |
| 21  | C      | -3.2035200 | -1.4053370 | 4.5209790  |

|    |   |            |            |            |
|----|---|------------|------------|------------|
| 22 | C | -1.6528350 | -1.0168790 | 6.2224200  |
| 23 | C | -0.4599920 | -0.2528070 | 6.6343150  |
| 24 | C | 1.1151410  | 1.3486990  | 5.9903500  |
| 25 | S | -3.8619820 | 4.1396530  | 6.0340300  |
| 26 | C | -3.8734210 | -2.3557400 | 5.2821320  |
| 27 | C | -2.2845850 | -1.9629220 | 7.0353650  |
| 28 | C | 0.1554170  | -0.3816420 | 7.8833790  |
| 29 | C | 1.7701120  | 1.2636580  | 7.2136390  |
| 30 | C | -3.4048150 | -2.6401250 | 6.5642820  |
| 31 | C | 1.2809690  | 0.3819910  | 8.1773190  |
| 32 | H | 1.4154180  | -1.1493400 | 4.2878280  |
| 33 | H | 2.6228500  | -2.8548680 | 2.9397030  |
| 34 | H | 1.7811980  | -3.3752590 | 0.6224580  |
| 35 | H | -0.2146430 | -2.1706230 | -0.2174520 |
| 36 | H | -1.8810650 | -1.0686050 | -0.8113790 |
| 37 | H | -3.8857040 | 0.2889940  | -1.3332810 |
| 38 | H | -4.7628590 | 1.8793430  | 0.4108830  |
| 39 | H | -3.5687450 | 2.0181510  | 2.6030470  |
| 40 | H | -1.9056150 | -2.1702370 | 8.0280270  |
| 41 | H | -3.9013030 | -3.3752400 | 7.1882840  |
| 42 | H | -4.7429990 | -2.8553000 | 4.8709530  |
| 43 | H | -3.5357790 | -1.1498030 | 3.5225930  |
| 44 | H | -0.2392180 | -1.0680640 | 8.6217410  |
| 45 | H | 1.7652250  | 0.2898830  | 9.1434710  |
| 46 | H | 2.6420790  | 1.8802350  | 7.3991580  |
| 47 | H | 1.4478730  | 2.0186810  | 5.2070120  |

Table ESI-4. DFT cartesian coordinates for  $3^+$ .

| Tag | Symbol | X          | Y          | Z         |
|-----|--------|------------|------------|-----------|
| 1   | Ru     | 0.1769170  | -2.8235970 | 2.6736460 |
| 2   | C      | -1.1573520 | -0.2339810 | 2.2167520 |
| 3   | C      | -1.3459840 | 1.1428600  | 2.0594330 |
| 4   | C      | -0.2890580 | 2.0140250  | 2.3050160 |
| 5   | C      | 0.9398610  | 1.4908480  | 2.7092280 |
| 6   | C      | 1.0678390  | 0.1135140  | 2.8442160 |
| 7   | N      | 0.0504230  | -0.7341820 | 2.6010900 |
| 8   | H      | -2.3072710 | 1.5332350  | 1.7499110 |
| 9   | H      | -0.4250150 | 3.0834810  | 2.1857900 |
| 10  | H      | 1.7888910  | 2.1323710  | 2.9155590 |
| 11  | H      | 1.9972960  | -0.3494780 | 3.1542600 |
| 12  | C      | -2.7615100 | -3.5107470 | 2.1149820 |
| 13  | C      | -4.0781020 | -3.2585890 | 1.7498200 |
| 14  | C      | -4.4675740 | -1.9413970 | 1.5058400 |
| 15  | C      | -3.5259000 | -0.9268680 | 1.6439420 |

|    |   |            |            |            |
|----|---|------------|------------|------------|
| 16 | C | -2.2155840 | -1.2415850 | 2.0175610  |
| 17 | N | -1.8411360 | -2.5350200 | 2.2449700  |
| 18 | H | -2.4134160 | -4.5180450 | 2.3074980  |
| 19 | H | -4.7757070 | -4.0832090 | 1.6583210  |
| 20 | H | -5.4857910 | -1.7064730 | 1.2153850  |
| 21 | H | -3.8101580 | 0.1023140  | 1.4638050  |
| 22 | C | -0.3249270 | -2.1292080 | 5.6225170  |
| 23 | C | -0.4540880 | -2.3802310 | 6.9830190  |
| 24 | C | -0.3803090 | -3.6984190 | 7.4334080  |
| 25 | C | -0.1870180 | -4.7149830 | 6.5037800  |
| 26 | C | -0.0685930 | -4.4014820 | 5.1462050  |
| 27 | N | -0.1330800 | -3.1071930 | 4.7153950  |
| 28 | H | -0.3680250 | -1.1209700 | 5.2296070  |
| 29 | H | -0.6059390 | -1.5538940 | 7.6679370  |
| 30 | H | -0.4726220 | -3.9325600 | 8.4883550  |
| 31 | H | -0.1291280 | -5.7446020 | 6.8338930  |
| 32 | C | 0.3292580  | -5.7601610 | 1.7854000  |
| 33 | C | 0.4009670  | -7.1378390 | 1.9534610  |
| 34 | C | 0.3270490  | -7.6609170 | 3.2451720  |
| 35 | C | 0.1791970  | -6.7888560 | 4.3194650  |
| 36 | C | 0.1123290  | -5.4112910 | 4.0867860  |
| 37 | N | 0.1916600  | -4.9118590 | 2.8218110  |
| 38 | H | 0.3803330  | -5.2963980 | 0.8073810  |
| 39 | H | 0.5135630  | -7.7797510 | 1.0873020  |
| 40 | H | 0.3808490  | -8.7308370 | 3.4148640  |
| 41 | H | 0.1151590  | -7.1788710 | 5.3273780  |
| 42 | O | 0.5405770  | -2.7798900 | 0.6066560  |
| 43 | C | 1.7057100  | -2.7672200 | 0.0754080  |
| 44 | C | 2.9372460  | -2.8134950 | 0.7555290  |
| 45 | H | 3.8265980  | -2.8067980 | 0.1371410  |
| 46 | C | 3.1457550  | -2.8707700 | 2.1462720  |
| 47 | O | 2.2412140  | -2.8738070 | 3.0523640  |
| 48 | C | 4.5653090  | -2.9234600 | 2.6719910  |
| 49 | C | 1.7084970  | -2.7078150 | -1.4381300 |
| 50 | H | 1.1796130  | -1.8081540 | -1.7703070 |
| 51 | H | 1.1629620  | -3.5685670 | -1.8396420 |
| 52 | H | 2.7172000  | -2.7008590 | -1.8540610 |
| 53 | H | 5.3079880  | -2.9168150 | 1.8726180  |
| 54 | H | 4.6990420  | -3.8275550 | 3.2754440  |
| 55 | H | 4.7435830  | -2.0672620 | 3.3314660  |

Table ESI-5. DFT cartesian coordinates for 4<sup>+</sup>.

| Tag | Symbol | X         | Y          | Z         |
|-----|--------|-----------|------------|-----------|
| 1   | Ru     | 0.1838900 | -2.8238530 | 2.6770610 |



|    |   |            |            |            |
|----|---|------------|------------|------------|
| 2  | C | -1.1385620 | -0.2235360 | 2.2463780  |
| 3  | C | -1.3205740 | 1.1554150  | 2.1013350  |
| 4  | C | -0.2584470 | 2.0189540  | 2.3518030  |
| 5  | C | 0.9689640  | 1.4862750  | 2.7476430  |
| 6  | C | 1.0901340  | 0.1071730  | 2.8710300  |
| 7  | N | 0.0671950  | -0.7326230 | 2.6246440  |
| 8  | H | -2.2802720 | 1.5533160  | 1.7966480  |
| 9  | H | -0.3891650 | 3.0900380  | 2.2418180  |
| 10 | H | 1.8220910  | 2.1216120  | 2.9560590  |
| 11 | H | 2.0185750  | -0.3627490 | 3.1735120  |
| 12 | C | -2.7558980 | -3.4927240 | 2.1033280  |
| 13 | C | -4.0721550 | -3.2303330 | 1.7439420  |
| 14 | C | -4.4568900 | -1.9083980 | 1.5196180  |
| 15 | C | -3.5110430 | -0.8994500 | 1.6701900  |
| 16 | C | -2.2013750 | -1.2244540 | 2.0368370  |
| 17 | N | -1.8318670 | -2.5223390 | 2.2456820  |
| 18 | H | -2.4117540 | -4.5039720 | 2.2814820  |
| 19 | H | -4.7731180 | -4.0508530 | 1.6421000  |
| 20 | H | -5.4747690 | -1.6654100 | 1.2346940  |
| 21 | H | -3.7916860 | 0.1332400  | 1.5052570  |
| 22 | C | -0.3413750 | -2.1579630 | 5.6277870  |
| 23 | C | -0.4901360 | -2.4232060 | 6.9836610  |
| 24 | C | -0.4358010 | -3.7470930 | 7.4194340  |
| 25 | C | -0.2404230 | -4.7549930 | 6.4807560  |
| 26 | C | -0.1010630 | -4.4272600 | 5.1286710  |
| 27 | N | -0.1482680 | -3.1276420 | 4.7122210  |
| 28 | H | -0.3696160 | -1.1448950 | 5.2461270  |
| 29 | H | -0.6422180 | -1.6032680 | 7.6761380  |
| 30 | H | -0.5442670 | -3.9924100 | 8.4702880  |
| 31 | H | -0.1967800 | -5.7887790 | 6.7997970  |
| 32 | C | 0.3410500  | -5.7511500 | 1.7591330  |
| 33 | C | 0.4033510  | -7.1309910 | 1.9131800  |
| 34 | C | 0.3045390  | -7.6677460 | 3.1974680  |
| 35 | C | 0.1435830  | -6.8069130 | 4.2790140  |
| 36 | C | 0.0875060  | -5.4266800 | 4.0605290  |
| 37 | N | 0.1889060  | -4.9142130 | 2.8025150  |
| 38 | H | 0.4118540  | -5.2773510 | 0.7871970  |
| 39 | H | 0.5281410  | -7.7638930 | 1.0421110  |
| 40 | H | 0.3501410  | -8.7397290 | 3.3560890  |
| 41 | H | 0.0620810  | -7.2075900 | 5.2814260  |
| 42 | H | -0.2575640 | -3.2885620 | -4.0733140 |
| 43 | H | 1.6563120  | -2.2616610 | -5.2879020 |
| 44 | C | 0.6042530  | -2.9228470 | -3.5226840 |
| 45 | C | 1.6799270  | -2.3481200 | -4.2055730 |
| 46 | C | 0.6331190  | -3.0280890 | -2.1333100 |

|    |   |            |            |            |
|----|---|------------|------------|------------|
| 47 | H | -0.2014720 | -3.4682100 | -1.5987640 |
| 48 | C | 2.7833400  | -1.8793440 | -3.4882940 |
| 49 | H | 3.6165520  | -1.4178440 | -4.0099490 |
| 50 | C | 1.7451260  | -2.5757540 | -1.4021940 |
| 51 | C | 2.8184230  | -1.9942420 | -2.0985830 |
| 52 | O | 0.5658110  | -2.7494510 | 0.6191500  |
| 53 | C | 1.7345380  | -2.7072870 | 0.0902360  |
| 54 | H | 3.6726790  | -1.6028550 | -1.5563020 |
| 55 | C | 2.9607950  | -2.8021780 | 0.7783620  |
| 56 | H | 3.8524510  | -2.7910270 | 0.1691060  |
| 57 | C | 3.1581680  | -2.9103300 | 2.1694230  |
| 58 | O | 2.2400330  | -2.8940170 | 3.0656720  |
| 59 | H | 5.4203470  | -3.9583290 | 0.9536290  |
| 60 | C | 4.5543160  | -3.0207140 | 2.7018720  |
| 61 | C | 5.6059070  | -3.5727420 | 1.9506090  |
| 62 | C | 4.8206630  | -2.5748030 | 4.0080250  |
| 63 | C | 6.8897820  | -3.6646100 | 2.4883580  |
| 64 | H | 4.0097260  | -2.1579380 | 4.5950610  |
| 65 | H | 7.6888850  | -4.1031530 | 1.8980760  |
| 66 | C | 6.1062530  | -2.6566040 | 4.5397410  |
| 67 | C | 7.1461060  | -3.2017700 | 3.7813180  |
| 68 | H | 6.2974150  | -2.2958250 | 5.5462150  |
| 69 | H | 8.1473300  | -3.2698590 | 4.1965120  |

Table ESI-6. DFT cartesian coordinates for  $5^+$ .

| Tag | Symbol | X          | Y          | Z         |
|-----|--------|------------|------------|-----------|
| 1   | Ru     | 0.0652200  | -2.5526210 | 2.5238240 |
| 2   | C      | -1.5584710 | -0.1234370 | 2.1379370 |
| 3   | C      | -1.9043480 | 1.2226710  | 1.9795610 |
| 4   | C      | -0.9270570 | 2.2040220  | 2.1111740 |
| 5   | C      | 0.3822770  | 1.8196660  | 2.4034640 |
| 6   | C      | 0.6650930  | 0.4669160  | 2.5472500 |
| 7   | N      | -0.2752550 | -0.4884190 | 2.4170750 |
| 8   | H      | -2.9259460 | 1.5040330  | 1.7572240 |
| 9   | H      | -1.1849120 | 3.2505270  | 1.9898660 |
| 10  | H      | 1.1757110  | 2.5492880  | 2.5173650 |
| 11  | H      | 1.6649130  | 0.1160360  | 2.7726170 |
| 12  | C      | -2.8124620 | -3.5496880 | 2.2177650 |
| 13  | C      | -4.1743290 | -3.4423620 | 1.9659040 |
| 14  | C      | -4.7197910 | -2.1780070 | 1.7423260 |
| 15  | C      | -3.8811990 | -1.0692860 | 1.7854570 |
| 16  | C      | -2.5180130 | -1.2381140 | 2.0474040 |
| 17  | N      | -1.9915350 | -2.4808620 | 2.2577410 |
| 18  | H      | -2.3473300 | -4.5122520 | 2.3892030 |

|    |   |            |            |            |
|----|---|------------|------------|------------|
| 19 | H | -4.7862740 | -4.3367920 | 1.9446300  |
| 20 | H | -5.7780750 | -2.0559270 | 1.5391140  |
| 21 | H | -4.2856870 | -0.0793160 | 1.6166110  |
| 22 | C | -0.3066290 | -1.8522860 | 5.4977420  |
| 23 | C | -0.3454990 | -2.0938170 | 6.8656790  |
| 24 | C | -0.1516290 | -3.3969450 | 7.3235920  |
| 25 | C | 0.0682570  | -4.4090060 | 6.3945770  |
| 26 | C | 0.0938980  | -4.1052820 | 5.0301080  |
| 27 | N | -0.0900020 | -2.8250730 | 4.5910230  |
| 28 | H | -0.4480060 | -0.8558010 | 5.0978030  |
| 29 | H | -0.5229080 | -1.2720430 | 7.5499030  |
| 30 | H | -0.1724970 | -3.6235520 | 8.3840030  |
| 31 | H | 0.2180760  | -5.4273550 | 6.7306670  |
| 32 | C | 0.4488220  | -5.4709370 | 1.6652580  |
| 33 | C | 0.6445740  | -6.8357480 | 1.8426530  |
| 34 | C | 0.6693080  | -7.3465240 | 3.1409250  |
| 35 | C | 0.4959060  | -6.4773320 | 4.2142990  |
| 36 | C | 0.3027270  | -5.1135520 | 3.9729380  |
| 37 | N | 0.2814580  | -4.6280510 | 2.7010130  |
| 38 | H | 0.4209280  | -5.0099140 | 0.6844100  |
| 39 | H | 0.7754820  | -7.4771210 | 0.9786830  |
| 40 | H | 0.8200970  | -8.4060500 | 3.3173820  |
| 41 | H | 0.5099460  | -6.8596250 | 5.2270750  |
| 42 | O | 0.3186130  | -2.5545680 | 0.4543590  |
| 43 | C | 1.3933800  | -2.1946320 | -0.1813930 |
| 44 | C | 2.7173760  | -2.0489510 | 0.3914120  |
| 45 | C | 3.0148050  | -2.3357720 | 1.7799160  |
| 46 | O | 2.1488820  | -2.4601590 | 2.6973320  |
| 47 | C | 4.4240850  | -2.5098570 | 2.2575900  |
| 48 | C | 1.2575210  | -1.9525220 | -1.5844390 |
| 49 | C | 3.7716050  | -1.5868510 | -0.4546410 |
| 50 | C | 3.5879760  | -1.3214970 | -1.7928590 |
| 51 | C | 2.3115610  | -1.5288440 | -2.3620910 |
| 52 | C | 5.3454140  | -3.3204030 | 1.5737840  |
| 53 | C | 6.6215170  | -3.5319490 | 2.0974120  |
| 54 | C | 6.9967960  | -2.9265880 | 3.2987550  |
| 55 | C | 6.0844080  | -2.1213670 | 3.9873720  |
| 56 | C | 4.8019570  | -1.9265900 | 3.4787890  |
| 57 | H | 2.1537530  | -1.3379000 | -3.4205080 |
| 58 | H | 0.2685710  | -2.0963370 | -2.0091540 |
| 59 | H | 4.7465280  | -1.4150950 | -0.0146590 |
| 60 | H | 4.4098680  | -0.9551080 | -2.3987870 |
| 61 | H | 5.0564260  | -3.7998650 | 0.6444670  |
| 62 | H | 7.3207810  | -4.1708270 | 1.5665900  |
| 63 | H | 4.0870190  | -1.3136460 | 4.0178830  |

|    |   |           |            |           |
|----|---|-----------|------------|-----------|
| 64 | H | 7.9936090 | -3.0846530 | 3.6995550 |
| 65 | H | 6.3713110 | -1.6495800 | 4.9223700 |

Table ESI-7. DFT cartesian coordinates for  $\mathbf{6}^+$ .

| Tag | Symbol | X          | Y          | Z         |
|-----|--------|------------|------------|-----------|
| 1   | Ru     | 0.0652200  | -2.5526210 | 2.5238240 |
| 2   | C      | -1.5584710 | -0.1234370 | 2.1379370 |
| 3   | C      | -1.9043480 | 1.2226710  | 1.9795610 |
| 4   | C      | -0.9270570 | 2.2040220  | 2.1111740 |
| 5   | C      | 0.3822770  | 1.8196660  | 2.4034640 |
| 6   | C      | 0.6650930  | 0.4669160  | 2.5472500 |
| 7   | N      | -0.2752550 | -0.4884190 | 2.4170750 |
| 8   | H      | -2.9259460 | 1.5040330  | 1.7572240 |
| 9   | H      | -1.1849120 | 3.2505270  | 1.9898660 |
| 10  | H      | 1.1757110  | 2.5492880  | 2.5173650 |
| 11  | H      | 1.6649130  | 0.1160360  | 2.7726170 |
| 12  | C      | -2.8124620 | -3.5496880 | 2.2177650 |
| 13  | C      | -4.1743290 | -3.4423620 | 1.9659040 |
| 14  | C      | -4.7197910 | -2.1780070 | 1.7423260 |
| 15  | C      | -3.8811990 | -1.0692860 | 1.7854570 |
| 16  | C      | -2.5180130 | -1.2381140 | 2.0474040 |
| 17  | N      | -1.9915350 | -2.4808620 | 2.2577410 |
| 18  | H      | -2.3473300 | -4.5122520 | 2.3892030 |
| 19  | H      | -4.7862740 | -4.3367920 | 1.9446300 |
| 20  | H      | -5.7780750 | -2.0559270 | 1.5391140 |
| 21  | H      | -4.2856870 | -0.0793160 | 1.6166110 |
| 22  | C      | -0.3066290 | -1.8522860 | 5.4977420 |
| 23  | C      | -0.3454990 | -2.0938170 | 6.8656790 |
| 24  | C      | -0.1516290 | -3.3969450 | 7.3235920 |
| 25  | C      | 0.0682570  | -4.4090060 | 6.3945770 |
| 26  | C      | 0.0938980  | -4.1052820 | 5.0301080 |
| 27  | N      | -0.0900020 | -2.8250730 | 4.5910230 |
| 28  | H      | -0.4480060 | -0.8558010 | 5.0978030 |
| 29  | H      | -0.5229080 | -1.2720430 | 7.5499030 |
| 30  | H      | -0.1724970 | -3.6235520 | 8.3840030 |
| 31  | H      | 0.2180760  | -5.4273550 | 6.7306670 |
| 32  | C      | 0.4488220  | -5.4709370 | 1.6652580 |
| 33  | C      | 0.6445740  | -6.8357480 | 1.8426530 |
| 34  | C      | 0.6693080  | -7.3465240 | 3.1409250 |
| 35  | C      | 0.4959060  | -6.4773320 | 4.2142990 |
| 36  | C      | 0.3027270  | -5.1135520 | 3.9729380 |
| 37  | N      | 0.2814580  | -4.6280510 | 2.7010130 |
| 38  | H      | 0.4209280  | -5.0099140 | 0.6844100 |
| 39  | H      | 0.7754820  | -7.4771210 | 0.9786830 |

|    |   |           |            |            |
|----|---|-----------|------------|------------|
| 40 | H | 0.8200970 | -8.4060500 | 3.3173820  |
| 41 | H | 0.5099460 | -6.8596250 | 5.2270750  |
| 42 | O | 0.3186130 | -2.5545680 | 0.4543590  |
| 43 | C | 1.3933800 | -2.1946320 | -0.1813930 |
| 44 | C | 2.7173760 | -2.0489510 | 0.3914120  |
| 45 | C | 3.0148050 | -2.3357720 | 1.7799160  |
| 46 | O | 2.1488820 | -2.4601590 | 2.6973320  |
| 47 | C | 4.4240850 | -2.5098570 | 2.2575900  |
| 48 | C | 1.2575210 | -1.9525220 | -1.5844390 |
| 49 | C | 3.7716050 | -1.5868510 | -0.4546410 |
| 50 | C | 3.5879760 | -1.3214970 | -1.7928590 |
| 51 | C | 2.3115610 | -1.5288440 | -2.3620910 |
| 52 | C | 5.3454140 | -3.3204030 | 1.5737840  |
| 53 | C | 6.6215170 | -3.5319490 | 2.0974120  |
| 54 | C | 6.9967960 | -2.9265880 | 3.2987550  |
| 55 | C | 6.0844080 | -2.1213670 | 3.9873720  |
| 56 | C | 4.8019570 | -1.9265900 | 3.4787890  |
| 57 | H | 2.1537530 | -1.3379000 | -3.4205080 |
| 58 | H | 0.2685710 | -2.0963370 | -2.0091540 |
| 59 | H | 4.7465280 | -1.4150950 | -0.0146590 |
| 60 | H | 4.4098680 | -0.9551080 | -2.3987870 |
| 61 | H | 5.0564260 | -3.7998650 | 0.6444670  |
| 62 | H | 7.3207810 | -4.1708270 | 1.5665900  |
| 63 | H | 4.0870190 | -1.3136460 | 4.0178830  |
| 64 | H | 7.9936090 | -3.0846530 | 3.6995550  |
| 65 | H | 6.3713110 | -1.6495800 | 4.9223700  |

Table ESI-8. DFT cartesian coordinates for 7<sup>+</sup>.

| Tag | Symbol | X          | Y          | Z         |
|-----|--------|------------|------------|-----------|
| 1   | Ru     | 0.0652200  | -2.5526210 | 2.5238240 |
| 2   | C      | -1.5584710 | -0.1234370 | 2.1379370 |
| 3   | C      | -1.9043480 | 1.2226710  | 1.9795610 |
| 4   | C      | -0.9270570 | 2.2040220  | 2.1111740 |
| 5   | C      | 0.3822770  | 1.8196660  | 2.4034640 |
| 6   | C      | 0.6650930  | 0.4669160  | 2.5472500 |
| 7   | N      | -0.2752550 | -0.4884190 | 2.4170750 |
| 8   | H      | -2.9259460 | 1.5040330  | 1.7572240 |
| 9   | H      | -1.1849120 | 3.2505270  | 1.9898660 |
| 10  | H      | 1.1757110  | 2.5492880  | 2.5173650 |
| 11  | H      | 1.6649130  | 0.1160360  | 2.7726170 |
| 12  | C      | -2.8124620 | -3.5496880 | 2.2177650 |
| 13  | C      | -4.1743290 | -3.4423620 | 1.9659040 |
| 14  | C      | -4.7197910 | -2.1780070 | 1.7423260 |
| 15  | C      | -3.8811990 | -1.0692860 | 1.7854570 |

|    |   |            |            |            |
|----|---|------------|------------|------------|
| 16 | C | -2.5180130 | -1.2381140 | 2.0474040  |
| 17 | N | -1.9915350 | -2.4808620 | 2.2577410  |
| 18 | H | -2.3473300 | -4.5122520 | 2.3892030  |
| 19 | H | -4.7862740 | -4.3367920 | 1.9446300  |
| 20 | H | -5.7780750 | -2.0559270 | 1.5391140  |
| 21 | H | -4.2856870 | -0.0793160 | 1.6166110  |
| 22 | C | -0.3066290 | -1.8522860 | 5.4977420  |
| 23 | C | -0.3454990 | -2.0938170 | 6.8656790  |
| 24 | C | -0.1516290 | -3.3969450 | 7.3235920  |
| 25 | C | 0.0682570  | -4.4090060 | 6.3945770  |
| 26 | C | 0.0938980  | -4.1052820 | 5.0301080  |
| 27 | N | -0.0900020 | -2.8250730 | 4.5910230  |
| 28 | H | -0.4480060 | -0.8558010 | 5.0978030  |
| 29 | H | -0.5229080 | -1.2720430 | 7.5499030  |
| 30 | H | -0.1724970 | -3.6235520 | 8.3840030  |
| 31 | H | 0.2180760  | -5.4273550 | 6.7306670  |
| 32 | C | 0.4488220  | -5.4709370 | 1.6652580  |
| 33 | C | 0.6445740  | -6.8357480 | 1.8426530  |
| 34 | C | 0.6693080  | -7.3465240 | 3.1409250  |
| 35 | C | 0.4959060  | -6.4773320 | 4.2142990  |
| 36 | C | 0.3027270  | -5.1135520 | 3.9729380  |
| 37 | N | 0.2814580  | -4.6280510 | 2.7010130  |
| 38 | H | 0.4209280  | -5.0099140 | 0.6844100  |
| 39 | H | 0.7754820  | -7.4771210 | 0.9786830  |
| 40 | H | 0.8200970  | -8.4060500 | 3.3173820  |
| 41 | H | 0.5099460  | -6.8596250 | 5.2270750  |
| 42 | O | 0.3186130  | -2.5545680 | 0.4543590  |
| 43 | C | 1.3933800  | -2.1946320 | -0.1813930 |
| 44 | C | 2.7173760  | -2.0489510 | 0.3914120  |
| 45 | C | 3.0148050  | -2.3357720 | 1.7799160  |
| 46 | O | 2.1488820  | -2.4601590 | 2.6973320  |
| 47 | C | 4.4240850  | -2.5098570 | 2.2575900  |
| 48 | C | 1.2575210  | -1.9525220 | -1.5844390 |
| 49 | C | 3.7716050  | -1.5868510 | -0.4546410 |
| 50 | C | 3.5879760  | -1.3214970 | -1.7928590 |
| 51 | C | 2.3115610  | -1.5288440 | -2.3620910 |
| 52 | C | 5.3454140  | -3.3204030 | 1.5737840  |
| 53 | C | 6.6215170  | -3.5319490 | 2.0974120  |
| 54 | C | 6.9967960  | -2.9265880 | 3.2987550  |
| 55 | C | 6.0844080  | -2.1213670 | 3.9873720  |
| 56 | C | 4.8019570  | -1.9265900 | 3.4787890  |
| 57 | H | 2.1537530  | -1.3379000 | -3.4205080 |
| 58 | H | 0.2685710  | -2.0963370 | -2.0091540 |
| 59 | H | 4.7465280  | -1.4150950 | -0.0146590 |
| 60 | H | 4.4098680  | -0.9551080 | -2.3987870 |

|    |   |           |            |           |
|----|---|-----------|------------|-----------|
| 61 | H | 5.0564260 | -3.7998650 | 0.6444670 |
| 62 | H | 7.3207810 | -4.1708270 | 1.5665900 |
| 63 | H | 4.0870190 | -1.3136460 | 4.0178830 |
| 64 | H | 7.9936090 | -3.0846530 | 3.6995550 |
| 65 | H | 6.3713110 | -1.6495800 | 4.9223700 |

Table ESI-9. DFT cartesian coordinates for  $\mathbf{8}^+$ .

| Tag | Symbol | X          | Y          | Z          |
|-----|--------|------------|------------|------------|
| 1   | Ru     | 0.1000830  | -1.7727940 | 0.0117300  |
| 2   | C      | 1.4541800  | -2.5672170 | -2.4833550 |
| 3   | C      | 1.7944400  | -2.6231140 | -3.8389000 |
| 4   | C      | 1.0315960  | -1.9224370 | -4.7681620 |
| 5   | C      | -0.0639550 | -1.1806830 | -4.3240490 |
| 6   | C      | -0.3511160 | -1.1608890 | -2.9644460 |
| 7   | N      | 0.3883870  | -1.8312640 | -2.0605910 |
| 8   | H      | 2.6441220  | -3.2080420 | -4.1680190 |
| 9   | H      | 1.2873230  | -1.9584790 | -5.8216120 |
| 10  | H      | -0.6877170 | -0.6230290 | -5.0132180 |
| 11  | H      | -1.1882720 | -0.6033420 | -2.5607000 |
| 12  | C      | 2.2491760  | -3.7961820 | 0.8602000  |
| 13  | C      | 3.3434070  | -4.6346910 | 0.6871970  |
| 14  | C      | 3.8686480  | -4.7987310 | -0.5948050 |
| 15  | C      | 3.2729710  | -4.1234470 | -1.6550610 |
| 16  | C      | 2.1703090  | -3.2960610 | -1.4201060 |
| 17  | N      | 1.6696710  | -3.1330770 | -0.1599150 |
| 18  | H      | 1.8132930  | -3.6343080 | 1.8383170  |
| 19  | H      | 3.7702690  | -5.1419200 | 1.5448440  |
| 20  | H      | 4.7245050  | -5.4420470 | -0.7679480 |
| 21  | H      | 3.6629590  | -4.2410960 | -2.6582970 |
| 22  | C      | -1.8944190 | -3.9514590 | -0.8276260 |
| 23  | C      | -2.9209270 | -4.8710190 | -0.6509140 |
| 24  | C      | -3.4266120 | -5.0750150 | 0.6331140  |
| 25  | C      | -2.8807740 | -4.3558960 | 1.6913920  |
| 26  | C      | -1.8455510 | -3.4466200 | 1.4528090  |
| 27  | N      | -1.3627610 | -3.2472270 | 0.1909330  |
| 28  | H      | -1.4764850 | -3.7551140 | -1.8073280 |
| 29  | H      | -3.3115180 | -5.4089620 | -1.5071170 |
| 30  | H      | -4.2301780 | -5.7817770 | 0.8093830  |
| 31  | H      | -3.2582890 | -4.5030660 | 2.6955460  |
| 32  | C      | 0.5023330  | -1.1115910 | 2.9809630  |
| 33  | C      | 0.2216420  | -1.1477160 | 4.3415360  |
| 34  | C      | -0.8090480 | -1.9737250 | 4.7926210  |
| 35  | C      | -1.5158560 | -2.7379400 | 3.8690310  |
| 36  | C      | -1.1855300 | -2.6609300 | 2.5120570  |

|    |   |            |            |            |
|----|---|------------|------------|------------|
| 37 | N | -0.1833020 | -1.8439050 | 2.0829070  |
| 38 | H | 1.2902150  | -0.4912500 | 2.5698200  |
| 39 | H | 0.8003070  | -0.5383530 | 5.0262410  |
| 40 | H | -1.0576930 | -2.0255040 | 5.8471040  |
| 41 | H | -2.3143690 | -3.3881920 | 4.2033770  |
| 42 | H | 8.2749460  | 1.9703370  | 0.4790980  |
| 43 | C | 7.3135700  | 2.4708470  | 0.3963790  |
| 44 | C | 7.2752260  | 3.8616760  | 0.3390970  |
| 45 | C | 6.1343270  | 1.7268060  | 0.3487580  |
| 46 | H | 6.1843740  | 0.6429620  | 0.3933120  |
| 47 | C | 6.0234160  | 4.5233120  | 0.2332840  |
| 48 | C | 4.8868730  | 2.3599580  | 0.2437150  |
| 49 | C | 4.8548240  | 3.7740970  | 0.1872760  |
| 50 | O | 1.5336500  | -0.2465660 | 0.0881490  |
| 51 | C | 1.2639580  | 1.0126510  | 0.0528060  |
| 52 | H | 3.9024370  | 4.2819410  | 0.1048540  |
| 53 | C | -0.0263850 | 1.5811440  | -0.0221240 |
| 54 | H | -0.0671450 | 2.6645510  | -0.0383370 |
| 55 | C | -1.2691420 | 0.9152800  | -0.0783250 |
| 56 | O | -1.4444970 | -0.3610850 | -0.0760650 |
| 57 | H | -4.1606150 | 4.0105650  | -0.2652500 |
| 58 | C | -4.9787680 | 1.9898280  | -0.3256290 |
| 59 | C | -5.0548550 | 3.3992950  | -0.3287120 |
| 60 | C | -6.1852610 | 1.2711010  | -0.4050300 |
| 61 | C | -6.2700440 | 4.0618810  | -0.4214410 |
| 62 | H | -6.1605090 | 0.1851790  | -0.3993580 |
| 63 | C | -7.4121990 | 1.9234010  | -0.4971660 |
| 64 | C | -7.4704910 | 3.3195540  | -0.5143730 |
| 65 | H | -8.3331670 | 1.3498110  | -0.5662500 |
| 66 | C | -2.4714700 | 1.7610560  | -0.1600260 |
| 67 | C | -3.7217750 | 1.2542810  | -0.2378290 |
| 68 | H | -2.3004110 | 2.8337380  | -0.1580890 |
| 69 | H | -3.8129790 | 0.1697030  | -0.2364840 |
| 70 | C | 2.3991170  | 1.9478040  | 0.1031120  |
| 71 | C | 3.6840340  | 1.5371110  | 0.1941880  |
| 72 | H | 2.1477530  | 3.0038040  | 0.0617330  |
| 73 | H | 3.8522220  | 0.4625430  | 0.2347420  |
| 74 | O | -8.6326720 | 4.0170230  | -0.6303040 |
| 75 | H | -9.3767220 | 3.3994370  | -0.6722980 |
| 76 | O | 8.3858910  | 4.6461170  | 0.3786030  |
| 77 | H | 9.1690490  | 4.0814250  | 0.4464170  |
| 78 | O | 6.0889940  | 5.8834710  | 0.1843540  |
| 79 | O | -6.2829880 | 5.4360560  | -0.4867510 |
| 80 | C | -6.8222540 | 6.1005500  | 0.6661780  |
| 81 | H | -6.2432630 | 5.8517950  | 1.5635510  |



|    |   |            |           |            |
|----|---|------------|-----------|------------|
| 82 | H | -7.8724410 | 5.8385920 | 0.8234190  |
| 83 | H | -6.7392500 | 7.1707130 | 0.4680480  |
| 84 | C | 4.8665260  | 6.6073640 | 0.0730460  |
| 85 | H | 4.3330120  | 6.3534880 | -0.8505530 |
| 86 | H | 5.1440700  | 7.6616290 | 0.0517790  |
| 87 | H | 4.2106940  | 6.4215760 | 0.9318410  |

**Full Citation # 30**

M. J. Frisch, G. W. Trucks, H. B. Schlegel, G. E. Scuseria, M. A. Robb, J. R. Cheeseman, G. Scalmani, V. Barone, B. Mennucci, G. A. Petersson, H. Nakatsuji, M. Caricato, X. Li, H. P. Hratchian, A. F. Izmaylov, J. Bloino, G. Zheng, J. L. Sonnenberg, M. Hada, M. Ehara, K. Toyota, R. Fukuda, J. Hasegawa, M. Ishida, T. Nakajima, Y. Honda, O. Kitao, H. Nakai, T. Vreven, J. A. Montgomery, Jr., J. E. Peralta, F. Ogliaro, M. Bearpark, J. J. Heyd, E. Brothers, K. N. Kudin, V. N. Staroverov, T. Keith, R. Kobayashi, J. Normand, K. Raghavachari, A. Rendell, J. C. Burant, S. S. Iyengar, J. Tomasi, M. Cossi, N. Rega, J. M. Millam, M. Klene, J. E. Knox, J. B. Cross, V. Bakken, C. Adamo, J. Jaramillo, R. Gomperts, R. E. Stratmann, O. Yazyev, A. J. Austin, R. Cammi, C. Pomelli, J. W. Ochterski, R. L. Martin, K. Morokuma, V. G. Zakrzewski, G. A. Voth, P. Salvador, J. J. Dannenberg, S. Dapprich, A. D. Daniels, O. Farkas, J. B. Foresman, J. V. Ortiz, J. Cioslowski, and D. J. Fox, Gaussian 09, Revision C.01, Gaussian, Inc., Wallingford CT, 2010.
